# Supplementary material for: DEAD-box RNA helicase 10 is required for 18S rRNA maturation by controlling the release of U3 snoRNA from pre-rRNA in embryonic stem cells
Source: PubMed Central journal article supplement — Nat Commun. 2024 Nov 27;15:10303. doi: 10.1038/s41467-024-53822-0 (PMC11603299; doi:10.1038/s41467-024-53822-0), 2024-11-27
Supplement: 41467_2024_53822_MOESM3_ESM.pdf [file 41467_2024_53822_MOESM3_ESM.pdf]

## **Description of Additional Supplementary Files**

**Supplementary Data 1.** Lists of downregulated genes in DDX10-AID mESCs treated with IAA for 48 h followed by washing off 48 h in contrast to the untreated mESCs. Related to Fig. 1.

**Supplementary Data 2.** Annotation of DDX10 peaks from CLIP-seq data. Related to Fig. 2a.

**Supplementary Data 3.** Antibodies used for Western blot (WB) and Immunofluorescence (IF). Related to Methods.

**Supplementary Data 4.** Lists of primers and probes used in this study. Related to Methods.
